# Supplementary material for: Faraday rotation and its dispersion in the visible region for saturated organic liquids
Source: Royal Society of Chemistry journal article supplement (doi:10.1039/c2cp23311h), 2011-12-07
Supplement: c2cp23311h.pdf [file c2cp23311h.pdf]

### Measured Verdet Constants of Liquids

(all values in  $^{\circ}/\text{Tm}$ )

| Wavelength (nm) | Pentane | ±    | Hexane | ±    | Heptane | ±    | Octane | ±    | Isooctane | ±    |
|-----------------|---------|------|--------|------|---------|------|--------|------|-----------|------|
| 400             | 404.58  | 1.27 | 423.07 | 1.42 | 430.01  | 1.30 | 439.72 | 1.08 | 472.03    | 1.42 |
| 410             | 396.83  | 1.57 | 410.19 | 1.09 | 425.07  | 1.51 | 432.76 | 1.21 | 467.86    | 1.35 |
| 420             | 382.26  | 0.83 | 394.46 | 2.89 | 408.48  | 0.81 | 418.53 | 1.43 | 449.47    | 0.90 |
| 430             | 367.18  | 0.89 | 382.56 | 1.14 | 392.28  | 1.30 | 401.83 | 1.30 | 430.31    | 1.75 |
| 440             | 350.33  | 1.22 | 363.93 | 1.22 | 373.63  | 1.38 | 387.43 | 1.36 | 410.48    | 2.06 |
| 450             | 336.89  | 0.63 | 345.94 | 0.81 | 358.44  | 1.70 | 366.00 | 0.62 | 390.01    | 0.88 |
| 460             | 320.29  | 0.92 | 329.70 | 0.95 | 338.51  | 1.00 | 347.65 | 0.59 | 369.78    | 0.71 |
| 470             | 307.07  | 1.02 | 313.62 | 1.17 | 325.51  | 1.45 | 331.94 | 0.70 | 356.38    | 0.95 |
| 480             | 295.06  | 1.01 | 303.53 | 1.45 | 313.44  | 1.03 | 323.17 | 1.35 | 342.60    | 1.42 |
| 490             | 279.69  | 0.83 | 289.86 | 1.06 | 298.94  | 1.42 | 305.85 | 0.98 | 325.27    | 0.85 |
| 500             | 269.32  | 0.86 | 276.07 | 0.74 | 285.65  | 0.59 | 294.06 | 0.96 | 311.70    | 0.70 |
| 510             | 255.87  | 1.03 | 263.89 | 1.12 | 271.55  | 0.58 | 282.23 | 1.22 | 298.09    | 0.93 |
| 520             | 245.41  | 0.68 | 251.85 | 0.73 | 260.99  | 0.65 | 268.07 | 1.15 | 283.24    | 0.84 |
| 530             | 234.52  | 1.21 | 241.41 | 0.51 | 250.07  | 0.65 | 256.82 | 0.87 | 270.51    | 1.06 |
| 540             | 225.87  | 0.78 | 233.40 | 1.06 | 241.63  | 0.73 | 246.83 | 0.72 | 262.92    | 1.03 |
| 550             | 218.98  | 0.92 | 224.34 | 0.68 | 232.22  | 0.90 | 239.39 | 0.86 | 253.99    | 1.23 |
| 560             | 211.65  | 0.79 | 215.74 | 0.70 | 224.53  | 1.09 | 230.69 | 0.95 | 243.34    | 0.72 |
| 570             | 204.30  | 0.75 | 209.16 | 0.98 | 215.45  | 1.13 | 221.69 | 0.69 | 233.75    | 1.01 |
| 580             | 195.69  | 1.04 | 200.20 | 0.61 | 208.07  | 0.94 | 213.12 | 1.02 | 224.48    | 0.58 |
| 590             | 188.24  | 0.75 | 193.86 | 0.62 | 200.30  | 0.44 | 205.24 | 0.47 | 214.83    | 0.88 |
| 600             | 181.22  | 0.48 | 186.13 | 0.76 | 193.36  | 0.96 | 198.06 | 0.73 | 207.20    | 0.66 |
| 610             | 172.50  | 0.54 | 176.46 | 0.81 | 183.22  | 0.52 | 188.64 | 0.66 | 197.64    | 0.29 |
| 620             | 167.16  | 0.35 | 171.53 | 0.34 | 178.28  | 0.39 | 183.28 | 0.33 | 192.09    | 0.77 |
| 630             | 163.81  | 0.97 | 168.90 | 0.95 | 174.32  | 0.69 | 178.74 | 0.74 | 187.43    | 0.63 |
| 640             | 159.91  | 1.01 | 163.66 | 0.68 | 169.09  | 0.57 | 174.61 | 0.69 | 182.02    | 0.47 |
| 650             | 153.27  | 0.50 | 157.87 | 0.44 | 163.72  | 0.67 | 167.46 | 1.01 | 176.05    | 0.74 |
| 660             | 148.81  | 0.98 | 152.95 | 0.58 | 157.48  | 0.62 | 161.99 | 0.90 | 171.70    | 1.02 |
| 670             | 142.90  | 0.31 | 146.95 | 0.23 | 151.94  | 0.40 | 156.40 | 0.66 | 165.09    | 0.76 |
| 680             | 138.06  | 0.50 | 142.63 | 0.48 | 146.63  | 0.54 | 151.10 | 0.52 | 159.45    | 0.83 |
| 690             | 133.66  | 0.52 | 138.24 | 0.76 | 143.65  | 0.49 | 146.90 | 0.50 | 153.91    | 0.62 |
| 700             | 128.82  | 0.56 | 135.12 | 0.54 | 139.72  | 0.54 | 143.85 | 0.49 | 149.73    | 0.35 |
| 710             | 126.32  | 0.23 | 130.83 | 0.27 | 135.75  | 0.57 | 138.32 | 0.64 | 145.56    | 0.34 |
| 720             | 122.30  | 0.49 | 126.84 | 0.58 | 131.09  | 0.71 | 134.78 | 0.64 | 140.89    | 0.37 |
| 730             | 119.82  | 0.41 | 124.02 | 0.46 | 127.72  | 0.66 | 131.96 | 0.66 | 137.78    | 0.64 |
| 740             | 116.28  | 0.38 | 119.87 | 0.71 | 124.54  | 0.60 | 127.63 | 0.36 | 134.41    | 0.54 |
| 750             | 113.46  | 0.46 | 116.80 | 0.73 | 120.72  | 0.67 | 124.00 | 0.54 | 130.50    | 0.48 |
| 760             | 109.43  | 0.44 | 112.65 | 0.48 | 116.77  | 0.55 | 120.22 | 0.60 | 125.60    | 0.40 |
| 770             | 107.80  | 0.56 | 110.96 | 0.30 | 114.15  | 0.57 | 117.73 | 0.31 | 123.70    | 0.49 |
| 780             | 106.78  | 0.53 | 108.90 | 0.55 | 114.48  | 0.96 | 117.89 | 0.61 | 122.38    | 0.74 |
| 790             | 102.73  | 0.41 | 106.70 | 0.41 | 111.40  | 0.52 | 113.78 | 0.43 | 119.77    | 0.48 |
| 800             | 99.28   | 0.40 | 101.70 | 0.34 | 106.30  | 0.30 | 109.10 | 0.34 | 114.69    | 0.69 |

| Cyclopentane | ±    | Cyclohexane | ±    | Methanol | ±    | Ethanol | ±    | 1-Propanol | ±    | 2-Propanol | ±    |
|--------------|------|-------------|------|----------|------|---------|------|------------|------|------------|------|
| 432.24       | 1.18 | 430.32      | 1.34 | 328.31   | 1.64 | 394.14  | 2.01 |            |      | 435.27     | 1.83 |
| 420.61       | 1.67 | 423.74      | 1.22 | 326.46   | 1.18 | 388.59  | 1.18 | 414.61     | 1.05 | 430.39     | 1.72 |
| 406.55       | 1.02 | 409.54      | 1.52 | 312.85   | 0.93 | 381.31  | 1.13 | 397.01     | 1.33 | 417.60     | 1.28 |
| 389.95       | 1.36 | 395.12      | 1.18 | 303.78   | 1.81 | 361.62  | 1.97 | 382.13     | 1.52 | 402.97     | 1.98 |
| 370.28       | 1.32 | 375.21      | 1.15 | 289.91   | 1.87 | 342.83  | 1.43 | 362.43     | 1.23 | 378.75     | 2.07 |
| 355.25       | 1.31 | 355.71      | 0.81 | 276.66   | 1.45 | 329.57  | 1.96 | 344.92     | 0.82 | 364.32     | 1.52 |
| 337.99       | 1.26 | 338.60      | 0.79 | 263.35   | 1.03 | 313.54  | 1.60 | 327.94     | 0.91 | 344.28     | 0.93 |
| 323.84       | 1.23 | 325.80      | 1.25 | 249.95   | 1.15 | 298.64  | 1.12 | 311.45     | 1.62 | 330.78     | 2.13 |
| 311.51       | 0.98 | 312.92      | 0.86 | 240.82   | 1.16 | 287.53  | 1.09 | 304.58     | 1.77 | 317.24     | 0.68 |
| 297.44       | 0.76 | 298.55      | 1.04 | 229.99   | 1.18 | 273.28  | 1.73 | 286.76     | 2.04 | 302.20     | 1.37 |
| 284.26       | 1.06 | 288.00      | 0.65 | 220.76   | 1.43 | 262.17  | 1.20 | 276.00     | 1.22 | 290.22     | 1.12 |
| 270.92       | 1.27 | 273.48      | 0.90 | 211.69   | 1.08 | 248.66  | 1.38 | 265.28     | 1.18 | 280.56     | 1.54 |
| 259.10       | 0.95 | 260.99      | 0.51 | 200.03   | 1.15 | 238.07  | 0.84 | 249.86     | 0.88 | 264.47     | 0.85 |
| 249.39       | 1.31 | 250.32      | 1.14 | 192.50   | 1.15 | 229.00  | 1.22 | 241.09     | 1.12 | 255.53     | 1.34 |
| 238.46       | 0.56 | 242.52      | 0.74 | 183.87   | 0.72 | 219.25  | 0.88 | 231.05     | 0.65 | 241.95     | 1.27 |
| 231.90       | 0.96 | 233.60      | 1.14 | 178.48   | 1.01 | 213.28  | 0.99 | 223.42     | 1.28 | 235.21     | 0.92 |
| 224.37       | 1.31 | 226.12      | 0.91 | 173.44   | 1.37 | 205.55  | 0.99 | 215.56     | 1.32 | 225.42     | 1.41 |
| 215.38       | 0.96 | 217.74      | 0.75 | 165.35   | 0.92 | 198.33  | 0.73 | 207.06     | 0.65 | 219.01     | 0.90 |
| 205.09       | 0.70 | 209.22      | 1.01 | 159.44   | 0.74 | 190.17  | 1.06 | 200.87     | 0.99 | 211.72     | 1.47 |
| 199.53       | 0.65 | 201.36      | 0.83 | 153.54   | 0.57 | 183.32  | 0.69 | 190.98     | 0.74 | 201.20     | 0.74 |
| 190.31       | 0.75 | 193.26      | 0.63 | 147.41   | 0.69 | 175.21  | 0.66 | 184.07     | 0.59 | 193.44     | 0.62 |
| 181.27       | 0.52 | 184.34      | 0.83 | 140.60   | 0.69 | 166.34  | 0.47 | 176.72     | 0.49 | 185.85     | 0.46 |
| 176.18       | 0.45 | 179.93      | 0.39 | 136.99   | 0.50 | 163.37  | 0.53 | 172.04     | 0.59 | 179.24     | 0.80 |
| 173.20       | 0.61 | 174.29      | 0.90 | 133.59   | 0.62 | 159.71  | 0.60 | 168.45     | 1.18 | 173.18     | 1.13 |
| 168.17       | 0.72 | 169.97      | 0.54 | 130.45   | 0.44 | 154.35  | 0.32 | 163.27     | 0.55 | 169.30     | 0.91 |
| 163.34       | 1.10 | 164.41      | 0.55 | 126.40   | 0.64 | 149.91  | 0.77 | 157.98     | 0.46 | 164.35     | 0.52 |
| 156.56       | 0.59 | 158.47      | 0.64 | 121.13   | 1.00 | 144.51  | 0.45 | 152.15     | 0.70 | 157.15     | 0.96 |
| 151.25       | 0.25 | 153.13      | 0.71 | 117.02   | 0.51 | 139.66  | 0.69 | 146.29     | 0.47 | 152.65     | 0.35 |
| 146.00       | 0.51 | 148.50      | 0.62 | 113.55   | 0.61 | 134.56  | 0.66 | 142.09     | 0.62 | 147.44     | 0.51 |
| 142.11       | 0.26 | 143.50      | 0.26 | 110.63   | 0.45 | 129.71  | 0.83 | 137.90     | 0.26 | 145.00     | 0.52 |
| 138.26       | 0.77 | 139.95      | 0.44 | 107.47   | 0.75 | 127.68  | 0.62 | 134.49     | 0.63 | 140.69     | 0.52 |
| 135.08       | 0.61 | 134.76      | 0.77 | 104.34   | 0.69 | 123.81  | 0.67 | 129.78     | 0.72 | 135.29     | 0.69 |
| 129.60       | 0.47 | 131.67      | 0.54 | 100.72   | 0.55 | 119.90  | 0.46 | 126.46     | 0.44 | 131.57     | 0.57 |
| 127.08       | 0.49 | 129.77      | 0.41 | 99.28    | 0.46 | 116.41  | 0.61 | 123.40     | 0.62 | 129.83     | 0.55 |
| 123.87       | 0.63 | 125.64      | 0.56 | 95.28    | 0.34 | 113.83  | 0.40 | 119.86     | 0.40 | 125.77     | 0.68 |
| 119.98       | 0.46 | 121.34      | 0.64 | 93.10    | 0.45 | 110.15  | 0.68 | 117.31     | 0.38 | 122.17     | 0.43 |
| 115.91       | 0.28 | 117.22      | 0.46 | 90.07    | 0.28 | 106.59  | 0.37 | 112.74     | 0.41 | 118.53     | 0.26 |
| 114.44       | 0.66 | 116.42      | 0.59 | 88.39    | 0.51 | 105.11  | 0.71 | 110.05     | 0.57 | 115.68     | 0.85 |
| 111.77       | 1.09 | 114.32      | 0.98 | 87.02    | 0.49 | 103.04  | 0.56 | 110.35     | 0.63 | 113.31     | 0.74 |
| 109.47       | 0.35 | 110.58      | 0.61 | 83.89    | 0.84 | 101.83  | 0.84 | 105.62     | 0.68 | 111.54     | 0.63 |
| 104.73       | 0.41 | 107.10      | 0.43 | 81.52    | 0.67 | 96.61   | 0.47 | 101.66     | 0.44 | 106.33     | 0.87 |

| 1-Butanol | ±    | 2-Butanol | ±    | Isobutanol | ±    | 1-Pentanol | ±    | 2-Pentanol | ±    | 3-Pentanol | ±    |
|-----------|------|-----------|------|------------|------|------------|------|------------|------|------------|------|
| 427.98    | 1.93 | 445.27    | 1.39 | 438.55     | 1.52 | 443.28     | 1.16 | 453.21     | 2.08 | 445.17     | 1.21 |
| 421.60    | 2.24 | 440.30    | 1.60 | 434.20     | 1.11 | 436.56     | 1.63 | 442.28     | 1.53 | 440.23     | 1.18 |
| 412.43    | 0.96 | 421.73    | 0.89 | 418.17     | 0.76 | 419.37     | 1.16 | 428.57     | 1.53 | 425.87     | 1.33 |
| 397.79    | 1.23 | 403.28    | 0.63 | 401.03     | 0.84 | 403.53     | 1.13 | 409.56     | 1.94 | 408.73     | 2.27 |
| 375.28    | 0.80 | 384.63    | 1.25 | 381.13     | 1.30 | 381.24     | 1.44 | 390.13     | 2.00 | 391.52     | 1.73 |
| 356.34    | 1.72 | 369.82    | 1.49 | 365.09     | 0.89 | 364.39     | 1.80 | 373.58     | 0.75 | 374.19     | 1.27 |
| 344.12    | 1.92 | 349.52    | 0.61 | 346.97     | 0.86 | 345.42     | 1.00 | 353.05     | 1.39 | 354.52     | 0.87 |
| 327.86    | 1.47 | 337.29    | 1.85 | 330.52     | 1.04 | 332.92     | 1.42 | 339.48     | 1.77 | 340.30     | 0.86 |
| 313.28    | 1.64 | 323.53    | 0.69 | 321.22     | 1.41 | 321.19     | 0.95 | 328.06     | 0.78 | 326.77     | 0.96 |
| 300.09    | 1.65 | 310.62    | 1.08 | 305.33     | 1.36 | 305.68     | 0.92 | 312.00     | 0.97 | 313.64     | 1.64 |
| 287.68    | 1.00 | 297.84    | 0.76 | 291.31     | 1.19 | 293.29     | 0.63 | 298.00     | 1.13 | 300.08     | 1.63 |
| 274.60    | 1.61 | 282.43    | 1.56 | 277.56     | 1.16 | 276.84     | 0.78 | 284.74     | 0.61 | 286.79     | 1.00 |
| 259.36    | 1.06 | 270.65    | 0.80 | 264.97     | 0.78 | 265.86     | 0.84 | 272.46     | 1.09 | 271.55     | 0.68 |
| 250.95    | 0.95 | 257.96    | 0.78 | 255.62     | 0.47 | 256.80     | 1.05 | 260.98     | 1.00 | 259.50     | 0.92 |
| 241.44    | 0.72 | 250.43    | 0.91 | 245.57     | 0.61 | 245.94     | 0.76 | 250.60     | 0.71 | 251.89     | 1.07 |
| 234.19    | 1.26 | 241.24    | 0.89 | 237.00     | 1.49 | 239.02     | 1.25 | 241.11     | 0.79 | 243.95     | 0.54 |
| 226.02    | 1.93 | 231.85    | 1.83 | 229.90     | 1.24 | 227.51     | 0.70 | 232.02     | 0.97 | 236.02     | 1.44 |
| 216.88    | 1.22 | 222.81    | 0.77 | 221.22     | 0.84 | 220.82     | 0.82 | 225.27     | 0.78 | 223.77     | 1.05 |
| 209.59    | 0.87 | 216.12    | 0.78 | 210.02     | 1.27 | 211.94     | 0.83 | 216.45     | 0.72 | 216.80     | 1.02 |
| 200.53    | 0.85 | 208.67    | 0.81 | 203.32     | 0.68 | 204.62     | 0.56 | 207.78     | 0.48 | 209.96     | 0.84 |
| 191.51    | 0.68 | 200.50    | 0.82 | 195.90     | 0.50 | 196.54     | 0.75 | 199.42     | 0.69 | 200.88     | 0.73 |
| 183.04    | 0.52 | 190.42    | 0.51 | 187.31     | 0.77 | 186.88     | 0.54 | 192.06     | 0.95 | 192.14     | 0.62 |
| 178.06    | 0.53 | 183.49    | 0.70 | 181.03     | 0.40 | 182.12     | 0.48 | 185.76     | 0.39 | 187.07     | 0.48 |
| 175.31    | 0.76 | 180.69    | 0.71 | 177.27     | 0.66 | 177.47     | 0.74 | 180.54     | 0.86 | 182.42     | 0.41 |
| 171.45    | 0.46 | 175.25    | 0.70 | 172.09     | 0.82 | 172.52     | 0.66 | 175.35     | 0.87 | 176.60     | 0.70 |
| 163.81    | 0.62 | 170.47    | 1.00 | 166.73     | 0.46 | 166.14     | 0.51 | 169.24     | 0.56 | 171.55     | 0.66 |
| 156.73    | 0.66 | 163.21    | 0.67 | 160.96     | 0.46 | 161.30     | 0.49 | 165.09     | 0.83 | 165.71     | 0.76 |
| 152.97    | 0.33 | 156.21    | 1.00 | 154.30     | 0.63 | 155.43     | 0.26 | 158.11     | 0.33 | 159.84     | 0.40 |
| 147.52    | 0.43 | 152.21    | 0.46 | 150.30     | 0.62 | 150.05     | 0.49 | 153.61     | 0.48 | 153.58     | 0.53 |
| 143.38    | 0.76 | 147.46    | 0.35 | 146.73     | 0.43 | 146.44     | 0.35 | 149.99     | 0.43 | 151.14     | 0.76 |
| 139.57    | 0.41 | 144.68    | 0.75 | 142.21     | 0.55 | 143.55     | 0.68 | 144.55     | 0.49 | 146.28     | 0.52 |
| 134.99    | 0.64 | 140.09    | 0.41 | 137.64     | 0.37 | 137.33     | 0.30 | 141.34     | 0.61 | 142.59     | 0.69 |
| 131.09    | 0.56 | 135.86    | 0.36 | 133.86     | 0.55 | 133.61     | 0.56 | 136.19     | 0.58 | 137.30     | 0.46 |
| 127.50    | 0.52 | 133.10    | 0.45 | 129.86     | 0.63 | 130.35     | 0.45 | 133.73     | 0.36 | 134.36     | 0.53 |
| 123.86    | 0.40 | 128.06    | 0.65 | 127.49     | 0.74 | 127.53     | 0.65 | 129.54     | 0.35 | 130.16     | 0.48 |
| 121.20    | 0.47 | 125.26    | 0.59 | 122.54     | 0.50 | 123.31     | 0.68 | 126.79     | 0.51 | 126.74     | 0.62 |
| 117.68    | 0.38 | 121.16    | 0.46 | 118.48     | 0.50 | 119.23     | 0.43 | 121.37     | 0.32 | 121.73     | 0.32 |
| 115.07    | 0.70 | 118.39    | 0.49 | 116.42     | 0.43 | 116.79     | 0.32 | 120.02     | 0.48 | 120.29     | 0.45 |
| 113.79    | 0.51 | 116.68    | 0.70 | 115.47     | 0.67 | 115.34     | 0.72 | 118.18     | 0.64 | 118.57     | 0.57 |
| 110.60    | 0.58 | 113.62    | 0.65 | 112.44     | 0.44 | 112.17     | 0.38 | 114.96     | 0.35 | 115.86     | 0.58 |
| 106.45    | 0.45 | 108.86    | 0.74 | 107.16     | 0.33 | 108.23     | 0.30 | 109.84     | 0.26 | 111.10     | 0.34 |

| 3-Methyl-1-Butanol | ±    | Hexanol | ±    | DiethylEther | ±    | MethylPropylEther | ±    | MTBE   | ±    |
|--------------------|------|---------|------|--------------|------|-------------------|------|--------|------|
| 456.25             | 1.11 | 446.39  | 0.99 | 383.51       | 1.69 | 381.86            | 1.91 | 404.95 | 0.97 |
| 447.26             | 1.45 | 442.71  | 1.22 | 377.53       | 1.88 | 374.67            | 1.21 | 395.75 | 1.25 |
| 431.21             | 1.53 | 428.71  | 1.66 | 364.52       | 0.72 | 358.72            | 1.89 | 382.38 | 1.48 |
| 411.65             | 1.15 | 411.71  | 1.22 | 348.70       | 1.01 | 345.97            | 1.00 | 368.66 | 1.17 |
| 393.07             | 1.23 | 390.50  | 1.42 | 334.31       | 1.78 | 330.52            | 1.41 | 349.92 | 1.15 |
| 373.44             | 1.21 | 373.31  | 1.29 | 320.68       | 1.56 | 315.58            | 1.35 | 333.39 | 0.68 |
| 353.29             | 1.23 | 356.55  | 1.12 | 302.34       | 0.95 | 296.85            | 1.09 | 315.08 | 0.82 |
| 341.56             | 0.89 | 339.82  | 1.37 | 289.90       | 0.64 | 288.63            | 1.11 | 304.74 | 0.92 |
| 329.61             | 1.00 | 325.93  | 1.46 | 273.74       | 1.03 | 275.39            | 1.33 | 291.14 | 0.95 |
| 313.13             | 1.55 | 315.87  | 1.44 | 263.09       | 1.28 | 263.67            | 0.98 | 278.41 | 1.20 |
| 299.89             | 0.77 | 303.82  | 0.96 | 251.89       | 0.98 | 253.29            | 0.46 | 267.21 | 0.81 |
| 285.40             | 1.88 | 286.85  | 0.92 | 239.36       | 0.90 | 241.44            | 0.69 | 255.05 | 0.92 |
| 273.20             | 0.79 | 274.92  | 0.77 | 229.94       | 0.64 | 229.14            | 0.51 | 243.38 | 1.00 |
| 262.55             | 0.93 | 263.92  | 0.66 | 219.34       | 0.64 | 220.41            | 0.54 | 233.96 | 0.56 |
| 252.43             | 1.30 | 253.71  | 0.82 | 213.00       | 0.62 | 212.73            | 0.73 | 223.78 | 0.73 |
| 244.40             | 0.84 | 245.59  | 0.83 | 206.85       | 0.85 | 204.05            | 0.81 | 217.62 | 0.60 |
| 235.08             | 0.62 | 237.38  | 1.00 | 199.13       | 0.58 | 196.99            | 1.04 | 209.62 | 0.53 |
| 226.61             | 0.71 | 228.01  | 0.81 | 189.93       | 0.83 | 189.52            | 0.56 | 201.71 | 0.96 |
| 215.78             | 0.67 | 218.33  | 0.87 | 187.65       | 0.98 | 182.70            | 0.60 | 193.45 | 0.87 |
| 210.53             | 0.77 | 211.18  | 0.68 | 179.39       | 0.43 | 175.85            | 0.78 | 186.89 | 0.55 |
| 200.92             | 0.72 | 204.23  | 1.22 | 172.58       | 0.68 | 169.76            | 0.92 | 180.31 | 0.59 |
| 191.81             | 0.59 | 194.83  | 0.84 | 164.92       | 0.49 | 160.89            | 0.58 | 172.98 | 0.91 |
| 187.01             | 0.56 | 188.73  | 0.67 | 159.87       | 0.65 | 156.05            | 0.24 | 166.04 | 0.63 |
| 181.05             | 0.82 | 183.72  | 0.51 | 155.49       | 0.76 | 153.24            | 0.33 | 162.50 | 0.47 |
| 177.60             | 0.72 | 179.43  | 0.55 | 151.39       | 0.61 | 149.08            | 0.73 | 157.59 | 0.49 |
| 171.34             | 0.92 | 173.47  | 0.71 | 146.98       | 0.63 | 144.66            | 0.49 | 152.94 | 0.55 |
| 164.99             | 0.56 | 167.88  | 0.72 | 141.06       | 0.65 | 139.25            | 0.45 | 147.89 | 0.58 |
| 158.66             | 0.36 | 161.44  | 0.59 | 135.17       | 0.44 | 134.27            | 0.38 | 143.17 | 0.71 |
| 153.99             | 0.45 | 155.97  | 0.58 | 130.57       | 0.78 | 130.04            | 0.51 | 137.66 | 0.61 |
| 150.44             | 0.28 | 152.04  | 0.53 | 127.53       | 0.64 | 126.18            | 0.50 | 134.09 | 0.52 |
| 145.04             | 0.77 | 147.62  | 0.34 | 123.70       | 0.47 | 122.76            | 0.30 | 131.32 | 0.52 |
| 142.35             | 0.47 | 142.87  | 0.41 | 120.39       | 0.42 | 119.19            | 0.40 | 125.62 | 0.33 |
| 136.47             | 0.59 | 139.08  | 0.47 | 116.82       | 0.52 | 114.62            | 0.60 | 122.49 | 0.60 |
| 133.85             | 0.35 | 135.70  | 0.41 | 112.96       | 0.38 | 111.07            | 0.42 | 119.34 | 0.56 |
| 130.23             | 0.31 | 131.54  | 0.42 | 110.08       | 0.48 | 108.03            | 0.76 | 115.85 | 0.56 |
| 126.20             | 0.54 | 128.74  | 0.50 | 107.83       | 0.59 | 105.71            | 0.67 | 113.32 | 0.44 |
| 122.29             | 0.51 | 123.67  | 0.57 | 103.67       | 0.42 | 101.90            | 0.41 | 109.33 | 0.68 |
| 119.75             | 0.46 | 120.72  | 0.69 | 102.08       | 0.43 | 99.92             | 0.23 | 107.50 | 0.46 |
| 117.43             | 0.61 | 118.47  | 0.66 | 101.25       | 0.76 | 98.41             | 0.51 | 106.10 | 0.76 |
| 115.91             | 0.46 | 117.25  | 0.68 | 97.36        | 0.38 | 95.66             | 0.32 | 102.57 | 0.50 |
| 110.50             | 0.34 | 112.43  | 0.22 | 94.18        | 0.48 | 92.22             | 0.50 | 98.50  | 0.25 |

| 1,2-Dimethoxyethane | ±    | Dioctylether | ±    | 2-MethoxyEthylether | ±    | Propylene Glycol | ±    |
|---------------------|------|--------------|------|---------------------|------|------------------|------|
| 389.35              | 0.78 | 461.37       | 2.28 | 409.45              | 1.04 | 451.64           | 2.89 |
| 380.95              | 0.86 | 455.75       | 1.59 | 399.07              | 1.04 | 447.16           | 1.62 |
| 367.39              | 1.49 | 442.23       | 1.28 | 386.92              | 0.95 | 431.41           | 1.48 |
| 353.33              | 1.68 | 424.91       | 1.37 | 370.61              | 0.70 | 416.00           | 1.44 |
| 335.68              | 0.94 | 406.16       | 1.40 | 351.90              | 1.63 | 394.35           | 0.94 |
| 320.77              | 0.39 | 388.65       | 0.98 | 339.72              | 1.45 | 375.30           | 1.14 |
| 303.20              | 0.96 | 368.68       | 1.21 | 319.39              | 0.63 | 359.05           | 1.27 |
| 292.25              | 0.91 | 353.47       | 1.20 | 307.62              | 1.11 | 345.07           | 1.75 |
| 282.03              | 0.75 | 341.78       | 0.99 | 297.53              | 1.00 | 333.60           | 1.01 |
| 269.73              | 1.43 | 324.59       | 1.19 | 280.82              | 1.06 | 318.54           | 1.36 |
| 258.15              | 0.57 | 311.05       | 0.83 | 270.34              | 1.10 | 303.09           | 0.74 |
| 246.00              | 0.87 | 296.81       | 0.71 | 256.46              | 0.92 | 289.87           | 1.23 |
| 235.49              | 0.72 | 282.93       | 0.49 | 246.09              | 0.71 | 277.32           | 0.48 |
| 227.32              | 0.89 | 270.82       | 0.50 | 234.91              | 0.83 | 265.09           | 1.28 |
| 217.30              | 0.49 | 261.42       | 0.72 | 227.22              | 0.50 | 255.41           | 0.91 |
| 210.83              | 0.99 | 253.90       | 1.31 | 220.15              | 0.43 | 247.12           | 0.80 |
| 203.87              | 0.85 | 242.60       | 1.17 | 209.73              | 0.96 | 238.74           | 0.94 |
| 194.30              | 0.80 | 232.93       | 0.94 | 203.90              | 0.90 | 229.25           | 0.89 |
| 187.00              | 0.49 | 227.17       | 0.95 | 194.51              | 0.88 | 218.42           | 0.36 |
| 179.28              | 0.35 | 217.86       | 0.95 | 188.29              | 0.71 | 210.66           | 0.36 |
| 171.29              | 0.51 | 208.99       | 0.69 | 180.42              | 0.73 | 202.34           | 0.43 |
| 164.46              | 0.65 | 199.86       | 0.69 | 172.07              | 0.45 | 194.40           | 0.60 |
| 159.44              | 0.33 | 193.49       | 0.59 | 169.02              | 0.54 | 188.17           | 0.67 |
| 155.07              | 0.44 | 188.62       | 0.78 | 164.03              | 0.52 | 183.64           | 0.57 |
| 150.08              | 0.33 | 184.10       | 0.37 | 159.35              | 0.29 | 179.46           | 0.90 |
| 146.88              | 0.55 | 178.74       | 0.62 | 153.69              | 0.65 | 174.83           | 1.03 |
| 140.95              | 0.69 | 171.73       | 0.74 | 149.39              | 0.63 | 167.28           | 0.87 |
| 135.65              | 0.33 | 166.36       | 0.52 | 143.51              | 0.44 | 161.29           | 0.47 |
| 132.06              | 0.45 | 160.71       | 0.33 | 139.57              | 0.51 | 155.71           | 0.61 |
| 127.81              | 0.30 | 155.39       | 0.41 | 135.04              | 0.54 | 150.55           | 0.55 |
| 124.97              | 0.30 | 151.60       | 0.62 | 131.47              | 0.42 | 147.06           | 0.76 |
| 121.18              | 0.36 | 147.37       | 0.54 | 127.68              | 0.33 | 143.16           | 0.39 |
| 117.21              | 0.58 | 142.64       | 0.54 | 123.22              | 0.45 | 138.34           | 1.00 |
| 114.46              | 0.69 | 139.51       | 0.81 | 121.15              | 0.46 | 135.59           | 0.35 |
| 111.39              | 0.41 | 135.90       | 0.53 | 117.95              | 0.41 | 132.44           | 0.97 |
| 107.99              | 0.58 | 131.17       | 0.45 | 113.98              | 0.44 | 127.52           | 0.51 |
| 104.31              | 0.30 | 127.05       | 0.54 | 110.23              | 0.52 | 123.17           | 0.36 |
| 102.91              | 0.32 | 124.87       | 0.58 | 108.40              | 0.37 | 120.66           | 0.98 |
| 101.73              | 0.56 | 124.24       | 0.72 | 107.09              | 0.34 | 119.65           | 0.53 |
| 99.22               | 0.40 | 120.17       | 0.51 | 104.05              | 0.57 | 118.70           | 0.57 |
| 94.33               | 0.46 | 115.80       | 0.47 | 100.00              | 0.28 | 112.99           | 0.37 |

| 1,3-PropaneDiol | ±    | n-ButylAmine | ±    | n-Octylamine | ±    | Acetone | ±    | DCM    | ±    | THF    | ±    |
|-----------------|------|--------------|------|--------------|------|---------|------|--------|------|--------|------|
| 424.23          | 1.19 | 470.28       | 1.64 | 471.41       | 1.64 | 394.33  | 1.70 | 565.07 | 1.87 | 395.09 | 1.78 |
| 420.83          | 1.51 | 462.34       | 1.67 | 466.95       | 1.08 | 390.06  | 1.10 | 555.12 | 3.10 | 389.14 | 1.31 |
| 406.24          | 1.30 | 448.24       | 1.35 | 450.10       | 1.08 | 379.14  | 1.24 | 539.32 | 1.75 | 376.00 | 0.62 |
| 394.61          | 1.71 | 429.61       | 1.68 | 433.46       | 1.13 | 363.40  | 1.57 | 516.82 | 2.29 | 359.24 | 2.15 |
| 374.01          | 1.72 | 411.26       | 1.95 | 413.26       | 1.64 | 346.24  | 1.12 | 494.71 | 2.09 | 346.73 | 0.86 |
| 360.09          | 1.78 | 389.70       | 1.52 | 396.89       | 1.20 | 330.40  | 0.89 | 473.48 | 1.84 | 328.12 | 1.59 |
| 339.73          | 1.32 | 370.85       | 1.45 | 375.19       | 0.76 | 312.91  | 1.54 | 446.25 | 1.37 | 315.13 | 1.04 |
| 329.44          | 0.71 | 355.49       | 1.87 | 361.40       | 0.71 | 298.65  | 1.76 | 428.77 | 1.66 | 300.02 | 1.58 |
| 316.61          | 1.17 | 338.84       | 1.19 | 348.01       | 0.72 | 286.66  | 1.57 | 410.76 | 1.12 | 288.09 | 1.28 |
| 304.05          | 1.52 | 322.69       | 1.41 | 332.63       | 1.41 | 274.81  | 1.36 | 389.96 | 2.58 | 274.43 | 1.44 |
| 289.23          | 1.07 | 311.56       | 1.26 | 313.06       | 0.82 | 263.43  | 0.86 | 376.69 | 2.08 | 263.32 | 2.02 |
| 277.08          | 0.91 | 294.91       | 1.55 | 302.12       | 1.25 | 252.63  | 1.64 | 357.67 | 1.77 | 251.07 | 2.25 |
| 263.50          | 0.73 | 281.01       | 1.26 | 290.63       | 0.97 | 240.06  | 0.91 | 340.82 | 0.90 | 239.15 | 0.80 |
| 254.48          | 0.75 | 269.96       | 0.88 | 277.64       | 0.99 | 229.06  | 1.24 | 325.93 | 1.25 | 230.43 | 0.97 |
| 243.65          | 0.72 | 260.54       | 1.32 | 268.76       | 0.82 | 219.45  | 0.80 | 315.53 | 1.37 | 221.29 | 1.06 |
| 237.53          | 0.87 | 250.15       | 1.37 | 258.81       | 0.73 | 211.69  | 1.50 | 303.02 | 1.06 | 215.13 | 1.25 |
| 228.41          | 0.80 | 240.54       | 1.13 | 249.41       | 0.93 | 206.22  | 0.83 | 292.53 | 0.98 | 207.97 | 1.17 |
| 219.92          | 1.14 | 231.18       | 1.02 | 240.56       | 0.98 | 198.06  | 0.90 | 280.64 | 1.36 | 197.21 | 0.66 |
| 210.66          | 0.62 | 224.98       | 1.40 | 229.41       | 1.16 | 191.13  | 1.01 | 270.49 | 1.24 | 191.14 | 0.98 |
| 204.45          | 0.42 | 213.90       | 0.83 | 221.18       | 0.61 | 182.19  | 0.93 | 261.03 | 0.94 | 184.29 | 0.57 |
| 195.83          | 0.56 | 206.97       | 0.91 | 213.86       | 0.83 | 174.84  | 0.95 | 251.12 | 1.25 | 175.99 | 0.45 |
| 188.11          | 0.78 | 197.76       | 0.59 | 204.12       | 1.03 | 168.41  | 0.59 | 238.33 | 0.72 | 168.46 | 0.85 |
| 182.56          | 0.75 | 193.10       | 0.51 | 196.83       | 0.67 | 161.02  | 0.65 | 230.30 | 0.53 | 164.61 | 0.86 |
| 179.26          | 0.72 | 188.57       | 0.45 | 194.70       | 0.80 | 157.83  | 0.93 | 225.95 | 0.79 | 158.85 | 0.66 |
| 172.29          | 0.72 | 181.35       | 1.12 | 188.22       | 0.59 | 153.64  | 0.77 | 220.21 | 1.20 | 154.64 | 0.45 |
| 168.39          | 0.61 | 176.73       | 0.79 | 181.93       | 0.68 | 150.13  | 0.56 | 212.48 | 0.79 | 149.32 | 0.41 |
| 162.51          | 0.52 | 170.95       | 0.80 | 174.62       | 0.53 | 143.52  | 0.69 | 205.55 | 0.63 | 144.84 | 0.80 |
| 156.61          | 0.60 | 163.96       | 0.46 | 169.09       | 0.59 | 139.07  | 0.50 | 197.41 | 0.73 | 139.99 | 0.45 |
| 150.65          | 0.53 | 158.84       | 0.55 | 163.04       | 0.77 | 134.46  | 0.45 | 191.48 | 0.64 | 135.94 | 0.61 |
| 147.38          | 0.48 | 154.58       | 0.83 | 158.05       | 0.50 | 132.04  | 0.55 | 185.92 | 0.90 | 130.98 | 0.41 |
| 143.29          | 0.32 | 150.32       | 1.01 | 156.01       | 0.43 | 126.95  | 0.84 | 181.23 | 0.37 | 127.74 | 0.48 |
| 139.54          | 0.24 | 146.28       | 0.55 | 150.61       | 0.60 | 122.99  | 0.39 | 174.30 | 0.75 | 124.16 | 0.69 |
| 134.40          | 0.53 | 141.71       | 0.47 | 145.13       | 0.58 | 119.58  | 0.40 | 169.98 | 0.46 | 120.06 | 0.30 |
| 131.09          | 0.56 | 139.09       | 0.61 | 141.90       | 0.60 | 116.83  | 0.33 | 166.08 | 0.51 | 117.04 | 0.56 |
| 128.38          | 0.52 | 134.75       | 0.54 | 138.10       | 0.71 | 113.87  | 0.40 | 160.91 | 0.52 | 114.40 | 0.52 |
|                 |      | 130.65       | 0.47 | 133.93       | 0.68 | 110.06  | 0.31 | 157.17 | 0.43 | 111.35 | 0.44 |
|                 |      | 125.74       | 0.38 | 130.07       | 0.63 | 106.19  | 0.47 | 151.04 | 0.32 | 107.53 | 0.39 |
|                 |      | 123.62       | 0.62 | 126.53       | 0.84 | 105.08  | 0.37 | 148.62 | 0.56 | 104.46 | 0.33 |
|                 |      | 121.85       | 0.45 | 126.97       | 1.22 | 103.43  | 0.28 | 146.71 | 0.45 | 103.44 | 0.42 |
|                 |      | 118.45       | 0.58 | 121.06       | 0.56 | 100.40  | 0.80 | 142.85 | 0.50 | 100.80 | 0.64 |
|                 |      | 113.49       | 0.80 | 117.25       | 0.48 | 96.62   | 0.63 | 136.67 | 0.67 | 95.81  | 0.51 |

| Tetrahydropyrene | ±    | 1,4 Dioxane | ±    | H2O    | ±    |
|------------------|------|-------------|------|--------|------|
| 415.27           | 1.47 | 401.02      | 1.36 | 468.85 | 1.70 |
| 406.53           | 1.23 | 394.76      | 1.71 | 459.23 | 2.22 |
| 394.68           | 2.12 | 380.72      | 0.99 | 443.83 | 1.15 |
| 379.47           | 1.52 | 366.42      | 1.33 | 425.90 | 1.82 |
| 362.50           | 2.15 | 347.82      | 1.78 | 406.51 | 1.64 |
| 346.79           | 1.67 | 331.40      | 1.02 | 386.67 | 1.13 |
| 327.04           | 0.98 | 312.85      | 1.31 | 366.84 | 1.52 |
| 314.13           | 1.15 | 303.82      | 1.02 | 350.29 | 0.94 |
| 302.64           | 0.62 | 293.05      | 1.05 | 336.84 | 1.16 |
| 291.96           | 1.43 | 278.99      | 0.78 | 321.11 | 2.17 |
| 277.12           | 0.91 | 266.04      | 0.77 | 307.83 | 1.92 |
| 263.48           | 0.97 | 253.85      | 1.40 | 294.26 | 1.43 |
| 252.06           | 1.04 | 244.53      | 1.07 | 280.23 | 1.12 |
| 242.98           | 0.78 | 231.53      | 0.86 | 270.38 | 1.56 |
| 233.61           | 0.95 | 223.25      | 0.78 | 257.88 | 1.35 |
| 226.48           | 0.85 | 216.06      | 0.72 | 249.04 | 0.99 |
| 216.23           | 0.86 | 209.72      | 1.07 | 241.12 | 0.93 |
| 207.55           | 0.79 | 200.06      | 0.61 | 231.64 | 1.37 |
| 200.89           | 0.62 | 194.24      | 0.78 | 222.06 | 0.89 |
| 194.36           | 0.37 | 186.65      | 0.57 | 214.05 | 0.94 |
| 186.22           | 0.84 | 178.56      | 0.63 | 205.20 | 1.12 |
| 178.34           | 0.78 | 170.73      | 0.72 | 195.84 | 0.45 |
| 172.51           | 0.60 | 164.89      | 0.32 | 190.99 | 0.39 |
| 169.35           | 0.53 | 161.95      | 0.68 | 186.00 | 0.47 |
| 163.64           | 0.73 | 156.77      | 1.11 | 181.92 | 1.06 |
| 159.41           | 0.59 | 152.06      | 0.58 | 174.03 | 0.59 |
| 152.60           | 0.47 | 147.39      | 0.56 | 168.63 | 0.70 |
| 148.18           | 0.62 | 141.25      | 0.40 | 162.90 | 0.51 |
| 142.37           | 0.61 | 138.05      | 0.67 | 156.91 | 0.55 |
| 138.22           | 0.81 | 133.24      | 0.47 | 153.66 | 0.71 |
| 134.65           | 0.73 | 129.26      | 0.45 | 149.93 | 0.94 |
| 130.95           | 0.32 | 125.15      | 0.58 | 144.64 | 0.55 |
| 126.75           | 0.73 | 122.45      | 0.44 | 139.14 | 0.45 |
| 123.82           | 0.30 | 119.13      | 0.39 | 136.56 | 0.58 |
| 120.98           | 0.37 | 116.17      | 0.34 | 132.22 | 0.49 |
| 117.75           | 0.48 | 112.40      | 0.70 | 129.34 | 0.40 |
| 112.94           | 0.34 | 108.77      | 0.38 | 124.76 | 0.43 |
| 110.58           | 0.43 | 106.33      | 0.30 | 122.01 | 0.56 |
| 109.45           | 0.66 | 106.49      | 1.13 | 120.19 | 0.53 |
| 107.18           | 0.30 | 102.85      | 0.32 | 116.90 | 0.71 |
| 102.70           | 0.48 | 98.33       | 0.51 | 112.06 | 0.53 |

**Calculated Verdet Constants of Liquids**  
(all values in  $^{\circ}/\text{Tm}$ )

| Wavelength (nm) | Pentane | Hexane | Heptane | Cyclopentane | Methanol | Ethanol | 1-Propanol | 2-Propanol |
|-----------------|---------|--------|---------|--------------|----------|---------|------------|------------|
| 400             | 357.70  | 375.01 | 378.83  | 350.80       | 204.52   | 290.82  | 312.37     | 411.23     |
| 410             | 337.96  | 354.30 | 357.89  | 331.92       | 193.93   | 275.35  | 295.62     | 387.69     |
| 420             | 320.31  | 335.78 | 339.17  | 315.00       | 184.39   | 261.45  | 280.59     | 366.74     |
| 430             | 303.94  | 318.61 | 321.80  | 299.25       | 175.49   | 248.51  | 266.61     | 347.38     |
| 440             | 288.75  | 302.68 | 305.70  | 284.61       | 167.18   | 236.47  | 253.61     | 329.49     |
| 450             | 274.68  | 287.91 | 290.78  | 271.01       | 159.44   | 225.27  | 241.52     | 312.96     |
| 460             | 261.64  | 274.24 | 276.96  | 258.39       | 152.24   | 214.87  | 230.30     | 297.70     |
| 470             | 249.01  | 260.99 | 263.57  | 246.14       | 145.22   | 204.76  | 219.41     | 282.96     |
| 480             | 237.87  | 249.31 | 251.77  | 235.31       | 139.01   | 195.82  | 209.78     | 269.99     |
| 490             | 227.58  | 238.52 | 240.87  | 225.30       | 133.25   | 187.55  | 200.88     | 258.04     |
| 500             | 217.58  | 228.03 | 230.27  | 215.54       | 127.62   | 179.49  | 192.20     | 246.45     |
| 510             | 208.36  | 218.36 | 220.50  | 206.54       | 122.42   | 172.04  | 184.19     | 235.78     |
| 520             | 199.88  | 209.47 | 211.52  | 198.25       | 117.62   | 165.18  | 176.81     | 225.99     |
| 530             | 192.09  | 201.30 | 203.27  | 190.63       | 113.20   | 158.87  | 170.03     | 217.01     |
| 540             | 184.49  | 193.33 | 195.22  | 183.18       | 108.87   | 152.70  | 163.40     | 208.27     |
| 550             | 177.07  | 185.56 | 187.36  | 175.91       | 104.64   | 146.67  | 156.92     | 199.75     |
| 560             | 170.73  | 178.91 | 180.65  | 169.68       | 101.01   | 141.50  | 151.38     | 192.48     |
| 570             | 164.09  | 171.95 | 173.62  | 163.16       | 97.20    | 136.09  | 145.57     | 184.87     |
| 580             | 158.46  | 166.05 | 167.66  | 157.62       | 93.96    | 131.49  | 140.64     | 178.43     |
| 590             | 152.53  | 159.83 | 161.37  | 151.78       | 90.54    | 126.64  | 135.44     | 171.65     |
| 600             | 147.14  | 154.18 | 155.67  | 146.47       | 87.43    | 122.23  | 130.70     | 165.50     |
| 610             | 142.29  | 149.07 | 150.50  | 141.66       | 84.60    | 118.24  | 126.41     | 159.93     |
| 620             | 137.51  | 144.06 | 145.44  | 136.94       | 81.83    | 114.32  | 122.21     | 154.49     |
| 630             | 132.82  | 139.14 | 140.48  | 132.32       | 79.11    | 110.47  | 118.09     | 149.15     |
| 640             | 128.61  | 134.73 | 136.02  | 128.15       | 76.66    | 107.01  | 114.38     | 144.36     |
| 650             | 124.47  | 130.39 | 131.64  | 124.07       | 74.25    | 103.61  | 110.73     | 139.66     |
| 660             | 120.41  | 126.14 | 127.35  | 120.05       | 71.88    | 100.27  | 107.15     | 135.05     |
| 670             | 116.78  | 122.34 | 123.51  | 116.46       | 69.76    | 97.29   | 103.96     | 130.94     |
| 680             | 113.22  | 118.61 | 119.74  | 112.94       | 67.68    | 94.35   | 100.81     | 126.90     |
| 690             | 109.72  | 114.94 | 116.04  | 109.47       | 65.63    | 91.47   | 97.72      | 122.94     |
| 700             | 106.62  | 111.69 | 112.76  | 106.40       | 63.81    | 88.91   | 94.99      | 119.43     |
| 710             | 103.58  | 108.50 | 109.54  | 103.38       | 62.02    | 86.40   | 92.30      | 115.99     |
| 720             | 100.58  | 105.36 | 106.37  | 100.41       | 60.26    | 83.92   | 89.64      | 112.60     |
| 730             | 97.63   | 102.27 | 103.24  | 97.49        | 58.53    | 81.48   | 87.04      | 109.27     |
| 740             | 95.05   | 99.56  | 100.51  | 94.93        | 57.01    | 79.35   | 84.75      | 106.35     |
| 750             | 92.51   | 96.90  | 97.83   | 92.40        | 55.51    | 77.24   | 82.50      | 103.48     |
| 760             | 90.00   | 94.28  | 95.18   | 89.92        | 54.03    | 75.17   | 80.28      | 100.66     |
| 770             | 87.54   | 91.69  | 92.57   | 87.47        | 52.57    | 73.13   | 78.10      | 97.88      |
| 780             | 85.11   | 89.15  | 90.00   | 85.05        | 51.14    | 71.12   | 75.95      | 95.14      |
| 790             | 83.01   | 86.95  | 87.78   | 82.97        | 49.90    | 69.38   | 74.09      | 92.78      |
| 800             | 80.95   | 84.79  | 85.60   | 80.92        | 48.67    | 67.67   | 72.26      | 90.45      |



| 1-Butanol | 2-Butanol | Isobutanol | 1-Pentanol | 2-Pentanol | 3-Pentanol | 3-Methyl-1-Butanol | DiethylEther |
|-----------|-----------|------------|------------|------------|------------|--------------------|--------------|
| 350.36    | 420.08    | 385.62     | 353.71     | 416.92     | 405.99     | 358.09             | 320.88       |
| 331.30    | 396.29    | 364.30     | 334.46     | 393.41     | 383.44     | 338.51             | 303.53       |
| 314.23    | 375.08    | 345.23     | 317.21     | 372.45     | 363.29     | 320.99             | 287.98       |
| 298.36    | 355.46    | 327.54     | 301.19     | 353.04     | 344.61     | 304.72             | 273.51       |
| 283.63    | 337.32    | 311.14     | 286.31     | 335.09     | 327.30     | 289.61             | 260.07       |
| 269.96    | 320.54    | 295.94     | 272.51     | 318.48     | 311.26     | 275.60             | 247.58       |
| 257.28    | 305.03    | 281.86     | 259.70     | 303.12     | 296.42     | 262.61             | 236.00       |
| 244.98    | 290.03    | 268.22     | 247.29     | 288.27     | 282.04     | 250.01             | 224.75       |
| 234.13    | 276.83    | 256.20     | 236.32     | 275.19     | 269.37     | 238.90             | 214.82       |
| 224.10    | 264.66    | 245.09     | 226.19     | 263.13     | 257.68     | 228.63             | 205.64       |
| 214.33    | 252.84    | 234.30     | 216.33     | 251.41     | 246.31     | 218.64             | 196.70       |
| 205.32    | 241.97    | 224.35     | 207.24     | 240.63     | 235.83     | 209.43             | 188.46       |
| 197.03    | 231.98    | 215.20     | 198.87     | 230.72     | 226.20     | 200.94             | 180.86       |
| 189.41    | 222.81    | 206.80     | 191.17     | 221.63     | 217.35     | 193.16             | 173.88       |
| 181.97    | 213.88    | 198.60     | 183.66     | 212.77     | 208.73     | 185.55             | 167.06       |
| 174.71    | 205.18    | 190.60     | 176.33     | 204.13     | 200.31     | 178.13             | 160.40       |
| 168.49    | 197.74    | 183.76     | 170.05     | 196.75     | 193.12     | 171.78             | 154.70       |
| 161.98    | 189.96    | 176.61     | 163.48     | 189.02     | 185.59     | 165.12             | 148.73       |
| 156.46    | 183.37    | 170.54     | 157.91     | 182.48     | 179.20     | 159.48             | 143.67       |
| 150.63    | 176.43    | 164.14     | 152.03     | 175.59     | 172.48     | 153.53             | 138.33       |
| 145.34    | 170.13    | 158.33     | 146.68     | 169.33     | 166.37     | 148.13             | 133.47       |
| 140.53    | 164.44    | 153.07     | 141.84     | 163.68     | 160.85     | 143.24             | 129.08       |
| 135.83    | 158.86    | 147.92     | 137.09     | 158.14     | 155.44     | 138.44             | 124.77       |
| 131.22    | 153.39    | 142.87     | 132.44     | 152.71     | 150.13     | 133.74             | 120.54       |
| 127.08    | 148.48    | 138.33     | 128.26     | 147.83     | 145.35     | 129.51             | 116.73       |
| 123.01    | 143.67    | 133.88     | 124.15     | 143.04     | 140.67     | 125.36             | 113.00       |
| 119.01    | 138.94    | 129.50     | 120.12     | 138.34     | 136.07     | 121.28             | 109.33       |
| 115.45    | 134.72    | 125.60     | 116.52     | 134.15     | 131.97     | 117.64             | 106.06       |
| 111.94    | 130.58    | 121.76     | 112.98     | 130.03     | 127.93     | 114.06             | 102.84       |
| 108.50    | 126.52    | 117.99     | 109.50     | 125.99     | 123.97     | 110.55             | 99.68        |
| 105.45    | 122.92    | 114.66     | 106.42     | 122.41     | 120.47     | 107.43             | 96.88        |
| 102.44    | 119.38    | 111.38     | 103.39     | 118.89     | 117.02     | 104.37             | 94.12        |
| 99.49     | 115.90    | 108.15     | 100.41     | 115.43     | 113.62     | 101.36             | 91.41        |
| 96.58     | 112.48    | 104.97     | 97.48      | 112.03     | 110.29     | 98.39              | 88.74        |
| 94.04     | 109.49    | 102.20     | 94.91      | 109.05     | 107.37     | 95.80              | 86.40        |
| 91.53     | 106.54    | 99.46      | 92.38      | 106.12     | 104.49     | 93.24              | 84.10        |
| 89.06     | 103.64    | 96.76      | 89.89      | 103.23     | 101.66     | 90.72              | 81.83        |
| 86.63     | 100.78    | 94.11      | 87.43      | 100.39     | 98.87      | 88.24              | 79.60        |
| 84.23     | 97.97     | 91.50      | 85.01      | 97.59      | 96.12      | 85.80              | 77.40        |
| 82.17     | 95.55     | 89.24      | 82.93      | 95.18      | 93.75      | 83.69              | 75.50        |
| 80.13     | 93.16     | 87.02      | 80.87      | 92.80      | 91.42      | 81.61              | 73.63        |

| MethylPropylEther | MTBE   | 1,2-Dimethoxyethane | n-ButylAmine | Acetone | DCM    | THF    | Tetrahydropyrane | H2O    |
|-------------------|--------|---------------------|--------------|---------|--------|--------|------------------|--------|
| 330.48            | 348.71 | 293.38              | 408.19       | 369.39  | 316.73 | 263.09 | 364.67           | 503.72 |
| 312.29            | 329.53 | 277.48              | 384.86       | 348.39  | 299.11 | 249.67 | 343.93           | 473.69 |
| 296.02            | 312.37 | 263.23              | 364.12       | 329.67  | 283.38 | 237.56 | 325.48           | 447.07 |
| 280.92            | 296.45 | 249.99              | 344.95       | 312.36  | 268.80 | 226.22 | 308.42           | 422.58 |
| 266.92            | 281.67 | 237.69              | 327.25       | 296.35  | 255.29 | 215.63 | 292.66           | 400.04 |
| 253.94            | 267.98 | 226.27              | 310.89       | 281.54  | 242.78 | 205.74 | 278.09           | 379.28 |
| 241.91            | 255.28 | 215.68              | 295.79       | 267.87  | 231.20 | 196.51 | 264.64           | 360.18 |
| 230.25            | 242.98 | 205.40              | 281.20       | 254.65  | 220.00 | 187.52 | 251.64           | 341.79 |
| 219.97            | 232.13 | 196.33              | 268.36       | 243.01  | 210.12 | 179.55 | 240.20           | 325.65 |
| 210.48            | 222.11 | 187.94              | 256.54       | 232.29  | 201.00 | 172.16 | 229.65           | 310.83 |
| 201.25            | 212.37 | 179.78              | 245.06       | 221.88  | 192.14 | 164.93 | 219.42           | 296.48 |
| 192.73            | 203.38 | 172.24              | 234.50       | 212.31  | 183.97 | 158.24 | 210.00           | 283.32 |
| 184.90            | 195.12 | 165.30              | 224.80       | 203.51  | 176.46 | 152.06 | 201.35           | 271.25 |
| 177.71            | 187.52 | 158.93              | 215.91       | 195.44  | 169.57 | 146.37 | 193.41           | 260.22 |
| 170.69            | 180.12 | 152.70              | 207.24       | 187.58  | 162.85 | 140.79 | 185.68           | 249.49 |
| 163.84            | 172.88 | 146.62              | 198.80       | 179.92  | 156.29 | 135.33 | 178.14           | 239.06 |
| 157.98            | 166.70 | 141.42              | 191.59       | 173.39  | 150.68 | 130.65 | 171.70           | 230.17 |
| 151.85            | 160.23 | 135.97              | 184.05       | 166.54  | 144.81 | 125.74 | 164.96           | 220.88 |
| 146.65            | 154.74 | 131.34              | 177.66       | 160.75  | 139.84 | 121.56 | 159.25           | 213.03 |
| 141.17            | 148.95 | 126.46              | 170.93       | 154.65  | 134.60 | 117.15 | 153.24           | 204.78 |
| 136.18            | 143.69 | 122.03              | 164.83       | 149.11  | 129.83 | 113.13 | 147.78           | 197.30 |
| 131.68            | 138.93 | 118.01              | 159.31       | 144.11  | 125.52 | 109.48 | 142.85           | 190.55 |
| 127.26            | 134.27 | 114.08              | 153.91       | 139.21  | 121.30 | 105.90 | 138.02           | 183.95 |
| 122.92            | 129.69 | 110.22              | 148.61       | 134.41  | 117.16 | 102.38 | 133.28           | 177.49 |
| 119.03            | 125.58 | 106.74              | 143.85       | 130.09  | 113.44 | 99.21  | 129.03           | 171.69 |
| 115.20            | 121.55 | 103.33              | 139.19       | 125.86  | 109.79 | 96.10  | 124.85           | 166.02 |
| 111.45            | 117.58 | 99.98               | 134.61       | 121.71  | 106.20 | 93.04  | 120.76           | 160.46 |
| 108.10            | 114.05 | 96.99               | 130.52       | 118.01  | 103.00 | 90.30  | 117.10           | 155.50 |
| 104.81            | 110.57 | 94.05               | 126.51       | 114.38  | 99.86  | 87.61  | 113.51           | 150.64 |
| 101.57            | 107.16 | 91.16               | 122.57       | 110.81  | 96.77  | 84.95  | 109.98           | 145.86 |
| 98.71             | 104.13 | 88.60               | 119.09       | 107.65  | 94.04  | 82.61  | 106.86           | 141.65 |
| 95.89             | 101.16 | 86.08               | 115.66       | 104.54  | 91.35  | 80.29  | 103.80           | 137.51 |
| 93.12             | 98.23  | 83.60               | 112.29       | 101.72  | 88.70  | 78.01  | 100.78           | 133.44 |
| 90.39             | 95.35  | 81.17               | 108.98       | 95.85   | 86.10  | 75.77  | 97.81            | 129.44 |
| 88.00             | 92.84  | 79.03               | 106.08       | 93.29   | 83.82  | 73.80  | 95.21            | 125.95 |
| 85.65             | 90.35  | 76.93               | 103.22       | 90.77   | 81.58  | 71.86  | 92.66            | 122.51 |
| 83.33             | 87.91  | 74.85               | 100.41       | 88.29   | 79.37  | 69.95  | 90.14            | 119.12 |
| 81.05             | 85.50  | 72.81               | 97.64        | 85.84   | 77.19  | 68.06  | 87.66            | 115.80 |
| 78.80             | 83.13  | 70.80               | 94.92        | 83.44   | 75.05  | 66.21  | 85.22            | 112.52 |
| 76.87             | 81.09  | 69.07               | 92.57        | 81.37   | 73.20  | 64.60  | 83.12            | 109.70 |
| 74.96             | 79.07  | 67.36               | 90.26        | 79.32   | 71.38  | 63.02  | 81.04            | 106.92 |
